# Supplementary material for: Neurological Involvement in Children with COVID-19 and MIS-C: A Retrospective Study Conducted for More than Two Years in a Pediatric Hospital
Source: MDPI journal article supplement (doi:10.3390/children9121809), 2022-11-24
Supplement: s1 [file s1]

**Table S1.** Neurological manifestations at the onset in the enrolled patients and in the two subgroups.

| Neurological Manifestations                                                            | Total<br>( <i>n</i> = 122) | COVID-19<br>( <i>n</i> = 95) | MIS-C<br>( <i>n</i> = 27) | <i>p</i> |
|----------------------------------------------------------------------------------------|----------------------------|------------------------------|---------------------------|----------|
| Total, <i>n</i> (%)                                                                    | 70 (57.4)                  | 58 (61.1)                    | 12 (44.4)                 | 0.124    |
| Time between disease onset and neurological manifestations, median (IQR) – <i>days</i> | 0 (0-2)                    | 0 (0-1)                      | 2 (0-3)                   | 0.007    |
| Consciousness impairment, <i>n</i> (%)                                                 | 36 (29.5)                  | 34 (35.8)                    | 2 (7.4)                   | 0.004    |
| Irritability/agitation, <i>n</i> (%)                                                   | 21 (17.2)                  | 20 (21.1)                    | 1 (3.7)                   | 0.042    |
| Drowsiness/hyporeactivity, <i>n</i> (%)                                                | 17 (13.9)                  | 16 (16.8)                    | 1 (3.7)                   | 0.116    |
| Confusion, <i>n</i> (%)                                                                | 2 (1.6)                    | 2 (2.1)                      | 0                         | 1.000    |
| Temporary LOC, <i>n</i> (%)                                                            | 2 (1.6)                    | 2 (2.1)                      | 0                         | 1.000    |
| Headache, <i>n</i> (%)                                                                 | 20 (16.4)                  | 12 (12.6)                    | 8 (29.6)                  | 0.035    |
| Seizures, <i>n</i> (%)                                                                 | 10 (8.2)                   | 10 (10.5)                    | 0                         | 0.115    |
| Dizziness, <i>n</i> (%)                                                                | 2 (1.6)                    | 1 (1.1)                      | 1 (3.7)                   | 0.395    |
| Dysgeusia, <i>n</i> (%)                                                                | 1 (0.8)                    | 0                            | 1 (3.7)                   | N.A.     |
| Photophobia, <i>n</i> (%)                                                              | 1 (0.8)                    | 0                            | 1 (3.7)                   | N.A.     |
| Phonophobia, <i>n</i> (%)                                                              | 1 (0.8)                    | 0                            | 1 (3.7)                   | N.A.     |
| Balance deficit and ataxia, <i>n</i> (%)                                               | 1 (0.8)                    | 1 (1.1)                      | 0                         | N.A.     |
| Hyper/hypotonia, <i>n</i> (%)                                                          | 1 (0.8)                    | 1 (1.1)                      | 0                         | N.A.     |
| Anxiety disorders, <i>n</i> (%)                                                        | 1 (0.8)                    | 1 (1.1)                      | 0                         | N.A.     |
| Behavioural changes, <i>n</i> (%)                                                      | 1 (0.8)                    | 1 (1.1)                      | 0                         | N.A.     |
| Sensibility alterations, <i>n</i> (%)                                                  | 1 (0.8)                    | 1 (1.1)                      | 0                         | N.A.     |
| Retrograde amnesia, <i>n</i> (%)                                                       | 1 (0.8)                    | 1 (1.1)                      | 0                         | N.A.     |
| Nistagmus, <i>n</i> (%)                                                                | 1 (0.8)                    | 1 (1.1)                      | 0                         | N.A.     |

LOC: loss of consciousness; N.A.: not applicable.

**Table S2.** Main extra-neurological manifestations in the two subgroups.

| <b>Signs and Symptoms</b>                 | <b>COVID-19<br/>(<i>n</i> = 95)</b> | <b>MIS-C<br/>(<i>n</i> = 27)</b> |
|-------------------------------------------|-------------------------------------|----------------------------------|
| Fever, <i>n</i> (%)                       | 71 (74.7)                           | 27 (100)                         |
| Reduced appetite, <i>n</i> (%)            | 34 (35.8)                           | 5 (18.5)                         |
| Respiratory symptoms, <i>n</i> (%)        | 43 (45.3)                           | 12 (44.4)                        |
| Cough, <i>n</i>                           | 27                                  | 4                                |
| Rhinitis, <i>n</i>                        | 21                                  | 1                                |
| Respiratory distress, <i>n</i>            | 16                                  | 12                               |
| Apnea, <i>n</i>                           | 3                                   | 0                                |
| Gastrointestinal symptoms, <i>n</i> (%)   | 25 (26.3)                           | 21 (77.8)                        |
| Vomit, <i>n</i>                           | 19                                  | 14                               |
| Diarrhea, <i>n</i>                        | 8                                   | 12                               |
| Abdominal pain, <i>n</i>                  | 5                                   | 11                               |
| Nausea, <i>n</i>                          | 4                                   | 2                                |
| Hepato- and/or splenomegaly, <i>n</i> (%) | 0                                   | 6 (22.2)                         |
| Sore throat or pharyngitis, <i>n</i> (%)  | 8 (8.4)                             | 0                                |
| Asthenia, <i>n</i> (%)                    | 7 (7.4)                             | 8 (29.6)                         |
| Arthralgia, <i>n</i> (%)                  | 1 (1.1)                             | 3 (11.1)                         |
| Arthritis, <i>n</i> (%)                   | 0                                   | 1 (3.7)                          |
| Myalgia, <i>n</i> (%)                     | 2 (2.1)                             | 0                                |
| Myositis, <i>n</i> (%)                    | 1 (1.1)                             | 0                                |
| Otalgia, <i>n</i> (%)                     | 3 (3.2)                             | 0                                |
| Thoracic pain, <i>n</i> (%)               | 3 (3.2)                             | 2 (7.4)                          |
| Palpitations, <i>n</i> (%)                | 1 (1.1)                             | 0                                |
| Muco-cutaneous involvement, <i>n</i> (%)  | 5 (5.3)                             | 24 (88.9)                        |
| Skin rash, <i>n</i>                       | 3                                   | 22                               |
| Conjunctivitis, <i>n</i>                  | 2                                   | 19                               |
| Mucositis/cheilitis, <i>n</i>             | 0                                   | 7                                |
| Extremities alterations, <i>n</i>         | 0                                   | 2                                |
| Uveitis, <i>n</i> (%)                     | 0                                   | 1 (3.7)                          |
| Lymphadenopathy, <i>n</i> (%)             | 0                                   | 4 (14.8)                         |
| Macrohematuria, <i>n</i> (%)              | 2 (2.1)                             | 0                                |

**Table S3.** Main laboratory findings in the enrolled patients and in the two subgroups.

| Laboratory Tests                                    | Total<br>(n = 122) | COVID-19<br>(n = 95)   | MIS-C<br>(n = 27)    | p      |
|-----------------------------------------------------|--------------------|------------------------|----------------------|--------|
| Altered CRP/tested pt, n/n (%)                      | 65/122 (53.3)      | 38/95 (40)             | 27/27 (100)          | <0.001 |
| CRP, median (IQR) – mg/dL                           | 0.73 (0.43-5.37)   | 0.5 (0.14-1.27)        | 20.29 (11.25-27.27)  | <0.001 |
| Altered PCT/tested pt, n/n (%)                      | 34/92 (37)         | 9/65 (13.8)            | 25/27 (92.6)         | <0.001 |
| PCT, median (IQR) – ng/mL                           | 0.08 (0.05-2.09)   | 0.05 (0.05-0.14)       | 11.03 (2.4-33.8)     | <0.001 |
| Altered ESR/tested pt, n/n (%)                      | 20/36 (55%)        | 3/16 (18.8)            | 17/20 (85)           | <0.001 |
| ESR, median (IQR) – mm/h                            | 44.5 (7.75-69.5)   | 7.5 (2-26.5)           | 68 (47.5-91.5)       | <0.001 |
| Min WBC count, median (IQR) – cell/ $\mu$ L         | 6765 (4752.5-9310) | 6670 (4815-9175)       | 7220 (4050-9375)     | 0.777  |
| Max WBC count, median (IQR) – cell/ $\mu$ L         | 8825 (6230-16150)  | 8110 (5690-10850)      | 18130 (14505-19630)  | <0.001 |
| Neutropenia <sup>#</sup> /tested pt, n/n (%)        | 36/121 (29.8)      | 32/94 (34)             | 4/27 (14.8)          | 0.060  |
| N min, median (IQR) – cell/ $\mu$ L                 | 2246 (1443-4479)   | 2033.5 (1294.3-3446.3) | 3924 (2303-6507.5)   | <0.001 |
| Lymphopenia <sup>*</sup> /tested pt, n/n (%)        | 47/121 (38.8)      | 27/94 (28.7)           | 20/27 (74.1)         | <0.001 |
| L min, median (IQR) – cell/ $\mu$ L                 | 1910 (995-3545)    | 2356 (1306.3-4018.3)   | 823 (499.5-1542)     | <0.001 |
| Thrombocytopenia <sup>§</sup> /tested pt, n/n (%)   | 17/122 (13.9)      | 6/95 (6.3)             | 11/27 (40.7)         | <0.001 |
| PLT min, median (IQR) – $\times 10^3$ cell/ $\mu$ L | 285 (199-388)      | 314 (216-408)          | 178 (121-298)        | <0.001 |
| Anemia <sup>°</sup> /tested pt, n/n (%)             | 39/122 (32)        | 17/95 (17.9)           | 22/27 (81.5)         | <0.001 |
| Hb min, median (IQR) – g/dL                         | 11.5 (10.6-12.7)   | 11.7 (11-12.8)         | 10 (8.9-11)          | <0.001 |
| Coagulopathy/tested pt, n/n (%)                     | 11/60 (18.3)       | 2/33 (6.1)             | 9/27 (33.3)          | <0.001 |
| Fibrinogen, median (IQR) – mg/dL                    | 474 (287.5-609)    | 317 (254.3-431.3)      | 573 (517.5-674.5)    | <0.001 |
| D-dimer, median (IQR) – $\mu$ g/L                   | 2856 (1232.3-5957) | 1085 (712.5-1262)      | 4292.5 (2877-6895.5) | <0.001 |
| T-troponin, median (IQR) – pg/mL                    | 30.2 (14.5-96)     | 22.1 (17.43-36.7)      | 32 (14.5-193)        | 0.527  |
| NT-pro-BNP, median (IQR) – pg/mL                    | 2547 (581.8-19352) | 58 (18-206.5)          | 9219 (1381.5-26931)  | <0.001 |

CRP: C-reactive protein; ESR: erythrocyte sedimentation rate; Hb: haemoglobin; L: lymphocytes; N: neutrophils; NT-proBNP: amino-terminal pro-hormone brain natriuretic peptide; PCT: procalcitonin; PLT: platelets; pt: patients; WBC: white blood cells

<sup>#</sup>Neutropenia: neutrophils <1.500 cells/ $\mu$ L

<sup>\*</sup>Lymphopenia: lymphocytes <1.500 cells/ $\mu$ L

<sup>§</sup>Thrombocytopenia: platelets <150  $\times 10^3$  cells/ $\mu$ L

<sup>°</sup>Anemia: haemoglobin < 2 standard deviation of normal range for age

**Table S4.** Management and outcome in the enrolled patients and in the two subgroups.

| <b>Treatment</b>                           | <b>Total<br/>(n = 122)</b> | <b>COVID-19<br/>(n = 95)</b> | <b>MIS-C<br/>(n = 27)</b> | <b>p</b> |
|--------------------------------------------|----------------------------|------------------------------|---------------------------|----------|
| Antibiotic treatment, n (%)                | 42 (34.4)                  | 17 (17.9)                    | 25 (92.6)                 | <0.001   |
| Oral steroids, n (%)                       | 33 (27)                    | 10 (10.5)                    | 23 (85.2)                 | <0.001   |
| Intravenous steroids, n (%)                | 30 (24.6)                  | 6 (6.3)                      | 24 (88.9)                 | <0.001   |
| IVIg, n (%)                                | 30 (24.6)                  | 3 (3.2)                      | 27 (100)                  | <0.001   |
| Anti-IL1 drugs, n (%)                      | 13 (10.7)                  | 0                            | 13 (48.1)                 | <0.001   |
| Oxygen/ventilatory support, n (%)          | 25 (20.5)                  | 12 (12.6)                    | 13 (48.1)                 | <0.001   |
| Heparin, n (%)                             | 14 (11.5)                  | 2 (2.1)                      | 12 (44.4)                 | <0.001   |
| Vasoactive/inotropic agents                | 10 (8.2)                   | 0                            | 10 (37)                   | <0.001   |
| Anti-SARS-CoV-2 drugs <sup>#</sup> , n (%) | 1 (0.8)                    | 1 (1.1)                      | 0                         | N.A.     |
| Monoclonal antibodies <sup>#</sup> , n (%) | 1 (0.8)                    | 1 (1.1)                      | 0                         | N.A.     |
| Benzodiazepines*, n (%)                    | 9 (7.4)                    | 8 (8.4)                      | 1 (3.7)                   | 0.682    |
| Length of stay, median (IQR) - days        | 4 (2-9)                    | 3 (2-5)                      | 11 (9-19)                 | <0.001   |
| ICU admission, n (%)                       | 16 (13.1)                  | 3 (3.2)                      | 13 (48.1)                 | <0.001   |
| Death, n (%)                               | 0                          | 0                            | 0                         | N.A.     |
| Symptoms/signs at discharge, n (%)         | 16 (13.1)                  | 10 (10.5)                    | 6 (22.2)                  | 0.112    |
| Follow-up duration, median (IQR) - days    | 122 (71.5-197.5)           | 118 (74.3-171.5)             | 152 (74.25-355.8)         | 0.082    |
| Symptoms/signs at last follow-up, n (%)    | 6 (4.9)                    | 4 (4.2)                      | 2 (7.4)                   | 0.631    |

ICU: intensive care unit; IL: interleukin; IVIg: intravenous immunoglobulin; N.A.: not applicable.

<sup>#</sup>Remdesivir was the used antiviral drug and Casirivimab and Imdevimab were the used monoclonal antibodies.

\*Benzodiazepines were administered by oral, nasal, rectal or parenteral route before the arrive to the hospital, at the Emergency Department or during the ward.
